# Supplementary material for: Microwave assisted antibacterial action of Garcinia nanoparticles on Gram-negative bacteria
Source: PubMed Central journal article supplement (PMC9072325; doi:10.1038/s41467-022-30125-w), 2022-05-05
Supplement: 41467_2022_30125_MOESM3_ESM.pdf [file 41467_2022_30125_MOESM3_ESM.pdf]

## Descriptions of additional supplementary Information files

**Supplementary Video 1** The conformational change process of OM front view under thermal effect (the group of Ctrl).

**Supplementary Video 2** The conformational change process of OM bottom view under thermal effect (the group of Ctrl).

**Supplementary Video 3** The conformational change process of OM front view under MV effect (the group of MV).

**Supplementary Video 4** The conformational change process of OM bottom view under MV effect (the group of MV).

**Supplementary Video 5** The conformational change process of the OM-GNs-1 system under MV effect.

**Supplementary Video 6** Dynamic process of GNs-1 during tensile dynamics simulation under MV effect.

**Supplementary Video 7** Dynamic process of GNs-1 during tensile dynamics simulation without MV.
